# Supplementary material for: An Evaluation of the Efficacy and Safety of TAMIXAM®, Based on Hyaluronic Acid and Tamarind Seed Extract, for Esophageal Mucosal Protection from Acid Insult
Source: MDPI journal article supplement (doi:10.3390/gidisord6010015), 2024-02-18
Supplement: s1 [file s1]

## SUPPLEMENTARY INFO

# An Evaluation of the Efficacy and Safety of TAMIXAM®, Based on Hyaluronic Acid and Tamarind Seed Extract, for the Esoph-ageal Mucosal Protection from Acid Insult

Marisa Francesca Motta<sup>1,2\*</sup>, Giuseppe Pulitano<sup>2</sup>, Antonino Bagnulo<sup>3</sup>, Giampaolo Buriani<sup>4</sup>, Umberto Di Maio<sup>5</sup>, Fabio Amone<sup>2</sup>, Vincenzo Nobile<sup>6</sup>, Rocco Malivindi<sup>1</sup>

**Table S1.** Results of the Macroscopical Evaluation (0=absence of erythema, 1=slight erythema, 2= well-defined erythema, 3= moderate erythema, 4= severe erythema or eschar formation)

| Day | Hamster treated | Before Treatment | After treatment | Mean | Hamster control | Before Treatment | After treatment | Mean |
|-----|-----------------|------------------|-----------------|------|-----------------|------------------|-----------------|------|
| 1   | 7               | 0                | 0               | 0    | 1               | 0                | 0               | 0    |
| 1   | 8               | 0                | 0               | 0    | 2               | 0                | 0               | 0    |
| 1   | 9               | 0                | 0               | 0    | 3               | 0                | 0               | 0    |
| 2   | 7               | 0                | 0               | 0    | 1               | 0                | 0               | 0    |
| 2   | 8               | 0                | 0               | 0    | 2               | 0                | 0               | 0    |
| 2   | 9               | 0                | 0               | 0    | 3               | 0                | 0               | 0    |
| 3   | 7               | 0                | 0               | 0    | 1               | 0                | 0               | 0    |
| 3   | 8               | 0                | 0               | 0    | 2               | 0                | 0               | 0    |
| 3   | 9               | 0                | 0               | 0    | 3               | 0                | 0               | 0    |
| 4   | 7               | 0                | 0               | 0    | 1               | 0                | 0               | 0    |
| 4   | 8               | 0                | 0               | 0    | 2               | 0                | 0               | 0    |
| 4   | 9               | 0                | 0               | 0    | 3               | 0                | 0               | 0    |
| 5   | 7               | 0                | 0               | 0    | 1               | 0                | 0               | 0    |
| 5   | 8               | 0                | 0               | 0    | 2               | 0                | 0               | 0    |
| 5   | 9               | 0                | 0               | 0    | 3               | 0                | 0               | 0    |
| 6   | 7               | 0                | 0               | 0    | 1               | 0                | 0               | 0    |
| 6   | 8               | 0                | 0               | 0    | 2               | 0                | 0               | 0    |
| 6   | 9               | 0                | 0               | 0    | 3               | 0                | 0               | 0    |
| 7   | 7               | 0                | 0               | 0    | 1               | 0                | 0               | 0    |
| 7   | 8               | 0                | 0               | 0    | 2               | 0                | 0               | 0    |
| 7   | 9               | 0                | 0               | 0    | 3               | 0                | 0               | 0    |
| 8   | 7               | 0                | 0               | 0    | 1               | 0                | 0               | 0    |
| 8   | 8               | 0                | 0               | 0    | 2               | 0                | 0               | 0    |
| 8   | 9               | 0                | 0               | 0    | 3               | 0                | 0               | 0    |
| 9   | 7               | 0                | 0               | 0    | 1               | 0                | 0               | 0    |
| 9   | 8               | 0                | 0               | 0    | 2               | 0                | 0               | 0    |
| 9   | 9               | 0                | 0               | 0    | 3               | 0                | 0               | 0    |
| 10  | 7               | 0                | 0               | 0    | 1               | 0                | 0               | 0    |
| 10  | 8               | 0                | 0               | 0    | 2               | 0                | 0               | 0    |
| 10  | 9               | 0                | 0               | 0    | 3               | 0                | 0               | 0    |

**Table S2** – Housing conditions for animals *Oral mucosa irritation test*

|                                |                                                                                                                                                                                                                                                                                                                                                                                                                                               |
|--------------------------------|-----------------------------------------------------------------------------------------------------------------------------------------------------------------------------------------------------------------------------------------------------------------------------------------------------------------------------------------------------------------------------------------------------------------------------------------------|
| Animals (breed)                | Syrian Hamsters                                                                                                                                                                                                                                                                                                                                                                                                                               |
| Identification                 | Animals will be individually identified with a progressive number starting from 1.                                                                                                                                                                                                                                                                                                                                                            |
| Weight                         | > 150 g                                                                                                                                                                                                                                                                                                                                                                                                                                       |
| Enrollment and acclimatization | On the enrollment day, animals will be individually weighed, identified and the veterinarian or qualified personnel will perform a clinical visit to verify the health status of animals. The enrolled animals will be acclimatized for at least 5 days. The actual acclimatization period will be reported in the Final Report.                                                                                                              |
| Food                           | A commercially available, GLP compliant, rodents' diet will be provided <i>ad libitum</i> . Feed label will be reported in the Final Report.                                                                                                                                                                                                                                                                                                  |
| Water                          | Drinking water will be provided <i>ad libitum</i> , delivered through an automatic watering system and/or drinking bottles.                                                                                                                                                                                                                                                                                                                   |
| Housing                        | Animals will be individually housed in polycarbonate cages with wire covers, identified by indicating the study code, the group code and animal number.                                                                                                                                                                                                                                                                                       |
| Environmental                  | <ul style="list-style-type: none"> <li>• The recommended temperature range for rodents is 20-24°C ± 1.5°C. The room temperature will be monitored by a data logger.</li> <li>• The relative humidity will not be lower than 45 ± 5% or higher than 65 ± 5%. The room relative humidity will be monitored by a data logger.</li> <li>• The light cycle will be controlled using an automatic timer (12 hours light, 12 hours dark).</li> </ul> |
| Animals health status          | Animals health status will be checked daily and the clinical observations will be reported on the experimental register.                                                                                                                                                                                                                                                                                                                      |
| Veterinary Care                | In the unlikely event that an animal should become injured, ill, or moribund, care will be conducted in accordance with current veterinary medical practice. If warranted for humane reasons, euthanasia will be conducted in accordance with the UE Recommendation 2007/526/CE, the ISO 10993-2, UE Directive 2010/63, enforced by Italian Legislative Decree Number 26 of March 4 <sup>th</sup> , 2014.                                     |

**Table S3** – Housing conditions for animals *Skin sensitization tests – guinea pig maximization tests (GPMT)*

|                            |                                                                                                                                                                                                                                                      |
|----------------------------|------------------------------------------------------------------------------------------------------------------------------------------------------------------------------------------------------------------------------------------------------|
| <b>Hartley guinea pigs</b> |                                                                                                                                                                                                                                                      |
| Acclimatization period     | Before the start of veterinary experimental procedures, animals should be acclimatized at least 5 days.                                                                                                                                              |
| Food                       | <p>A commercially available, GLP compliant, rodents' diet will be provided <i>ad libitum</i>. Feed label will be reported in the Final Report.</p> <p>A daily check of the food presence will be done and reported on the experimental register.</p> |

|                 |                                                                                                                                                                                                                                                                                                                                                                                                                                   |
|-----------------|-----------------------------------------------------------------------------------------------------------------------------------------------------------------------------------------------------------------------------------------------------------------------------------------------------------------------------------------------------------------------------------------------------------------------------------|
| Water           | Drinking water will be provided <i>ad libitum</i> , delivered through drinking bottles.<br>A daily check of the water presence will be done and reported on the experimental register.                                                                                                                                                                                                                                            |
| Housing         | Animals will be group housed in Noryl cages, labelled with the study code, experimental group and the animal identification number.                                                                                                                                                                                                                                                                                               |
| Environmental   | <ul style="list-style-type: none"> <li>• The recommended temperature range for guinea pigs is 18-24°C. The room temperature will be monitored by a data logger.</li> <li>• The relative humidity will not be lower than 30% or higher than 70%. The room relative humidity will be monitored by a data logger.</li> <li>• The light cycle will be controlled using an automatic timer (12 hours light, 12 hours dark).</li> </ul> |
| Veterinary Care | In the unlikely event that an animal should become injured, ill, or moribund, care will be conducted in accordance with current veterinary medical practice. If warranted for humane reasons, euthanasia will be conducted in accordance with the UE Recommendation 2007/526/CE, the ISO 10993-2, UE Directive 2010/63, enforced by Italian Legislative Decree Number 26 of March 4 <sup>th</sup> , 2014.                         |

**Table S4** Cytotoxicity test

| Grade | Reactivity | Reactivity description                                                                                                                         |
|-------|------------|------------------------------------------------------------------------------------------------------------------------------------------------|
| 0     | none       | Discrete amount of intracellular granulations; no cell lysis                                                                                   |
| 1     | light      | not more than 20% of the cells are round, approximately adhesions and without intracellular granulations; occasional presence of lysis cells   |
| 2     | slight     | no more than 50% of cells are round and without granulation intracellular; not extensive presence of cell lysis and empty areas between cells. |
| 3     | moderate   | no more than 70% of the cell layer contains round or lised cells.                                                                              |
| 4     | severe     | Almost complete destruction of the cell layer                                                                                                  |

**Table S5** Oral mucosa irritation test

The reactions that appeared in the treated area were assessed macroscopically on the basis of the following rating scale

| Mean score | Description of response |
|------------|-------------------------|
| 0          | None                    |
| 1 to 4     | Minimal                 |
| 5 to 8     | Slight                  |
| 9 to 10    | Moderate                |

**Table S6** - Histological preparations were evaluated using the following rating scale:

| <b>Epithelium</b>                |   | <b>Leukocyte infiltration</b> |   | <b>Vascular congestion</b> |   | <b>Edema</b> |   |
|----------------------------------|---|-------------------------------|---|----------------------------|---|--------------|---|
| Normal                           | 0 | Absent                        | 0 | Absent                     | 0 | Absent       | 0 |
| Degeneration or flattening cells | 1 | Minimal – less than 25        | 1 | Minimal                    | 1 | Minimal      | 1 |
| Metaplasia                       | 2 | Slight – 26-50                | 2 | Slight                     | 2 | Slight       | 2 |
| Focal erosion                    | 3 | Moderate 51-100               | 3 | Moderate                   | 3 | Moderate     | 3 |
| Generalised erosion              | 4 | Marked – greater than 100     | 4 | Marked with vessl rupture  | 4 | Marked       | 4 |

**Table S7** – Irritation Index

| Mean score | Description of response |
|------------|-------------------------|
| 0          | None                    |
| 1-4        | Minimal                 |
| 5-8        | Slight                  |
| 9-11       | Moderate                |
| 12-16      | Severe                  |

**Table S8** – Scoring System Skin sensitization tests - guinea pig maximization test (GPMT)

| Erythema: erythema and excoriations | Description of response |
|-------------------------------------|-------------------------|
| Absence of erythema 0               | 0                       |
| Discrete or irregular erythema 1    | 1                       |
| Moderate and confluent erythema 2   | 2                       |
| Intense erythema and/or swelling 3  | 3                       |
